# Supplementary material for: Insight into photon conversion of Nd3+ doped low temperature grown p and n type tin oxide thin films
Source: Royal Society of Chemistry journal article supplement (doi:10.1039/c6ra14460h), 2016-01-01
Supplement: c6ra14460h1.pdf [file c6ra14460h1.pdf]

## Supporting information

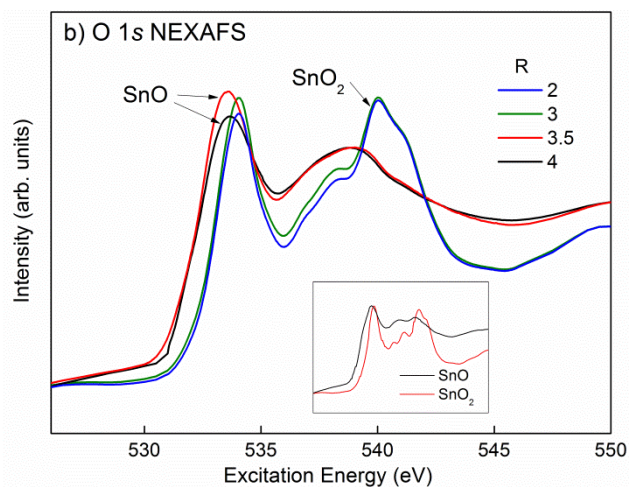

Figure S1. O 1s NEXAFS spectra of Nd-doped SnO<sub>x</sub> samples versus the Ar/O<sub>2</sub> gas flow ratio. The spectra of SnO and SnO<sub>2</sub> powder shown in the inset of each graph were added for comparison.

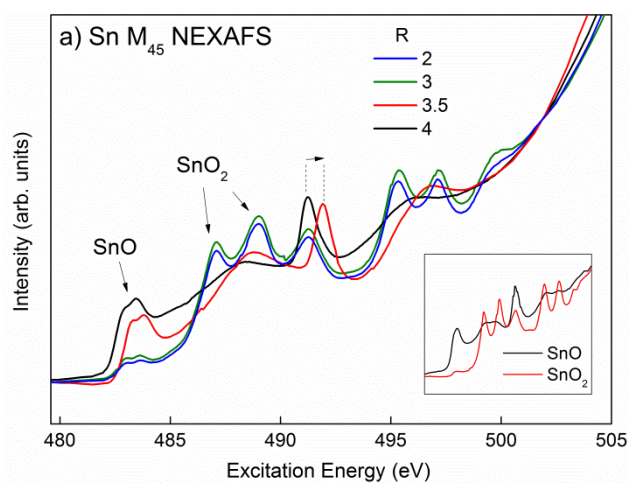

Figure S1. Sn M<sub>4,5</sub> NEXAFS spectra of Nd-doped SnO<sub>x</sub> samples versus the Ar/O<sub>2</sub> gas flow ratio. The spectra of SnO and SnO<sub>2</sub> powder shown in the inset of each graph were added for comparison.
